# Supplementary material for: Ropivacaine inhibits the malignant behavior of lung cancer cells by regulating retinoblastoma-binding protein 4
Source: PeerJ journal article supplement (doi:10.7717/peerj.16471), 2023-11-27

A

A549 cells

RBBP4

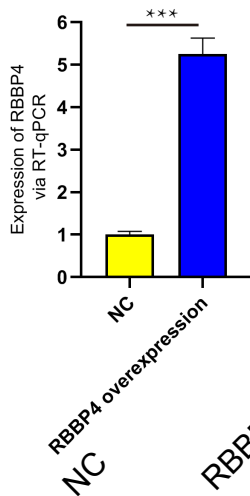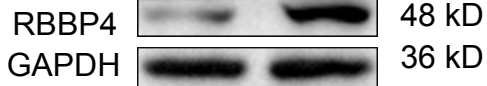

B

H1299 cells

RBBP4

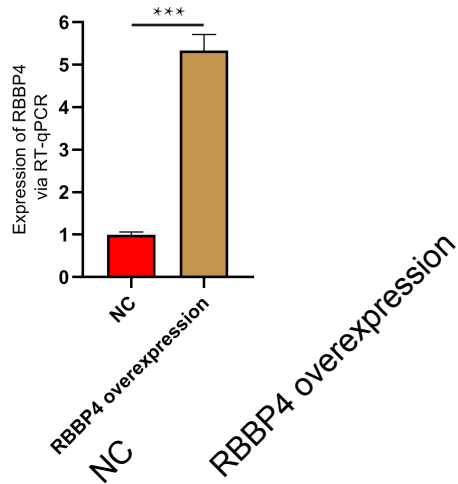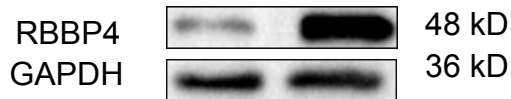

Supplement: supplementary_figure_2.pdf [file supplementary_figure_2.pdf]
